# Supplementary material
Source: PubMed Central journal article supplement (PMC4289691)
Supplement: mmc1.pdf [file mmc1.pdf]

The American Journal of Human Genetics, Volume 96

Supplemental Data

**Meta-analysis of Correlated Traits  
via Summary Statistics from GWASs  
with an Application in Hypertension**

Xiaofeng Zhu, Tao Feng, Bamidele O. Tayo, Jingjing Liang, J. Hunter Young, Nora Franceschini, Jennifer A. Smith, Lisa R. Yanek, Yan V. Sun, Todd L. Edwards, Wei Chen, Mike Nalls, Ervin Fox, Michele Sale, Erwin Bottinger, Charles Rotimi, The COGENT BP Consortium, Yongmei Liu, Barbara McKnight, Kiang Liu, Donna K. Arnett, Aravinda Chakravati, Richard S. Cooper, and Susan Redline

Supplementary Figure 1. Cohort specific effects for the top 4 loci for SBP, DBP and HTN. A horizontal line refers  $\pm 1SE$ .

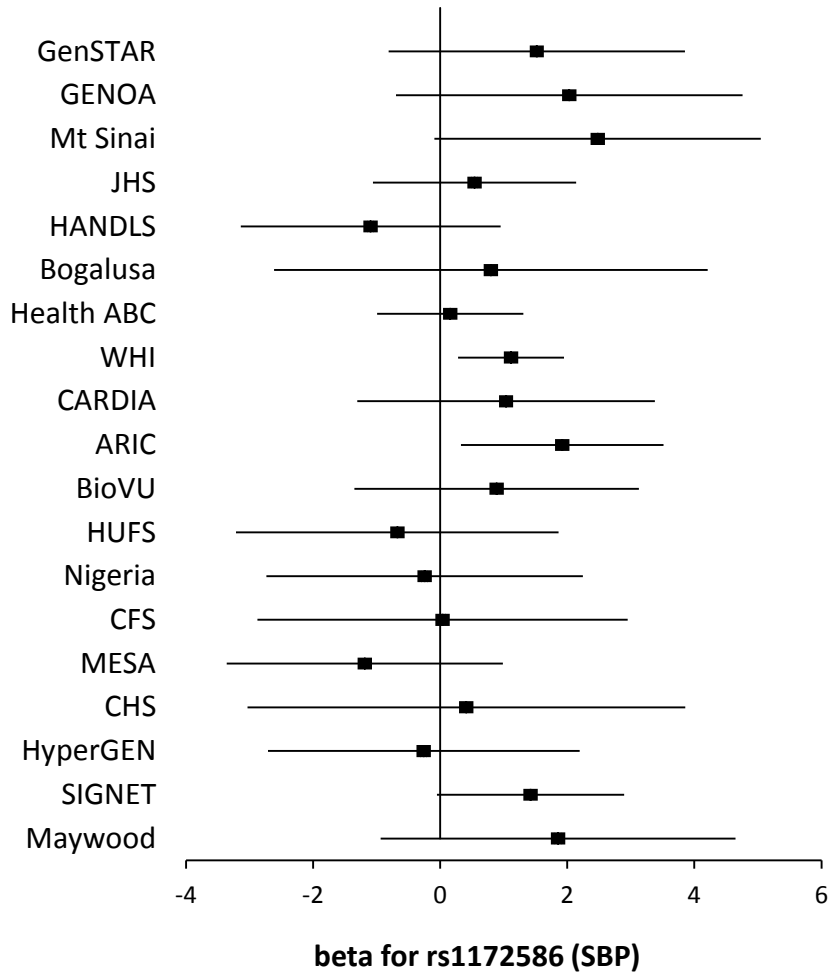

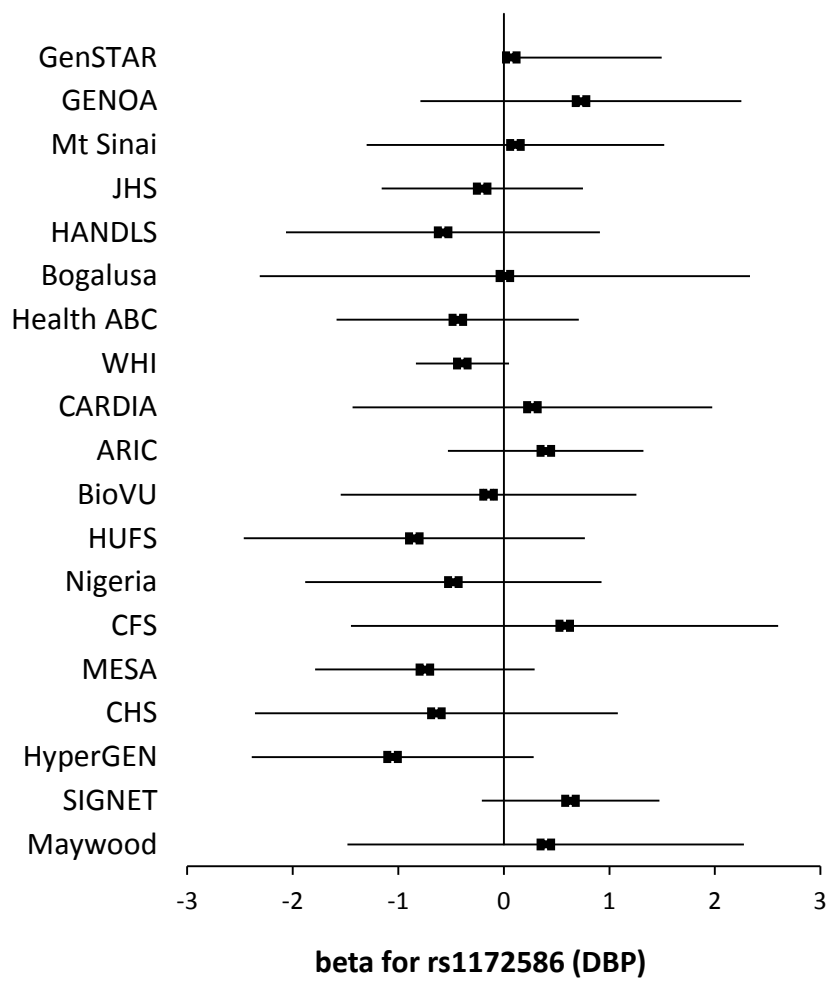

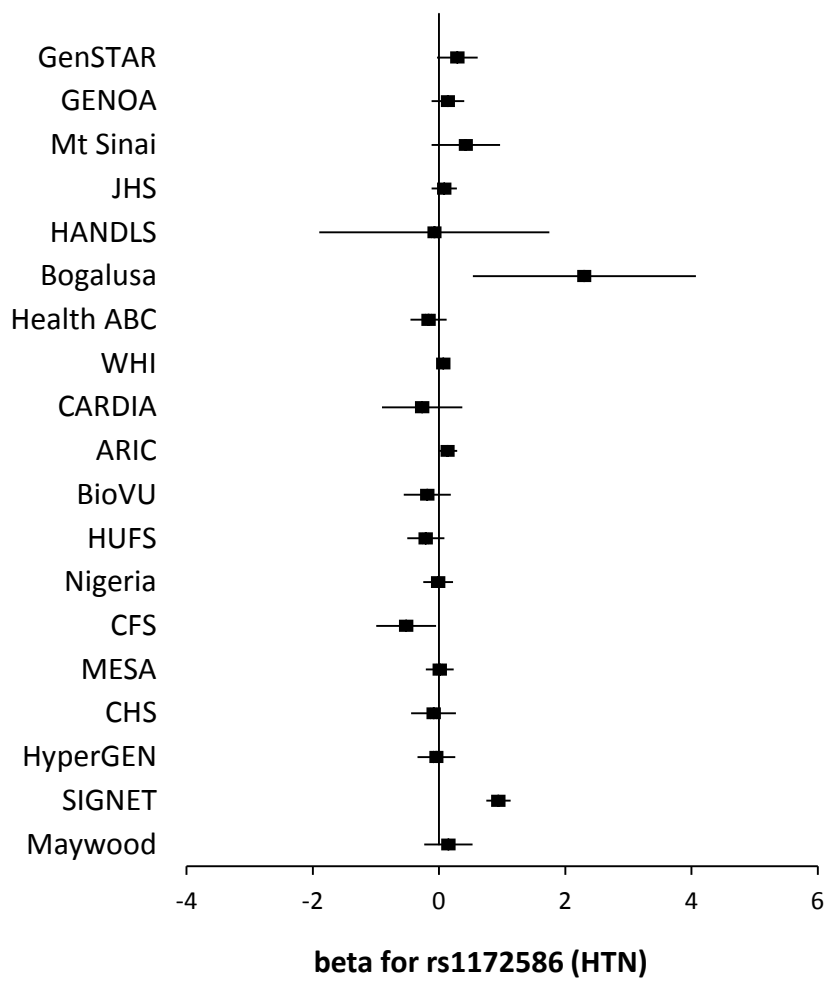

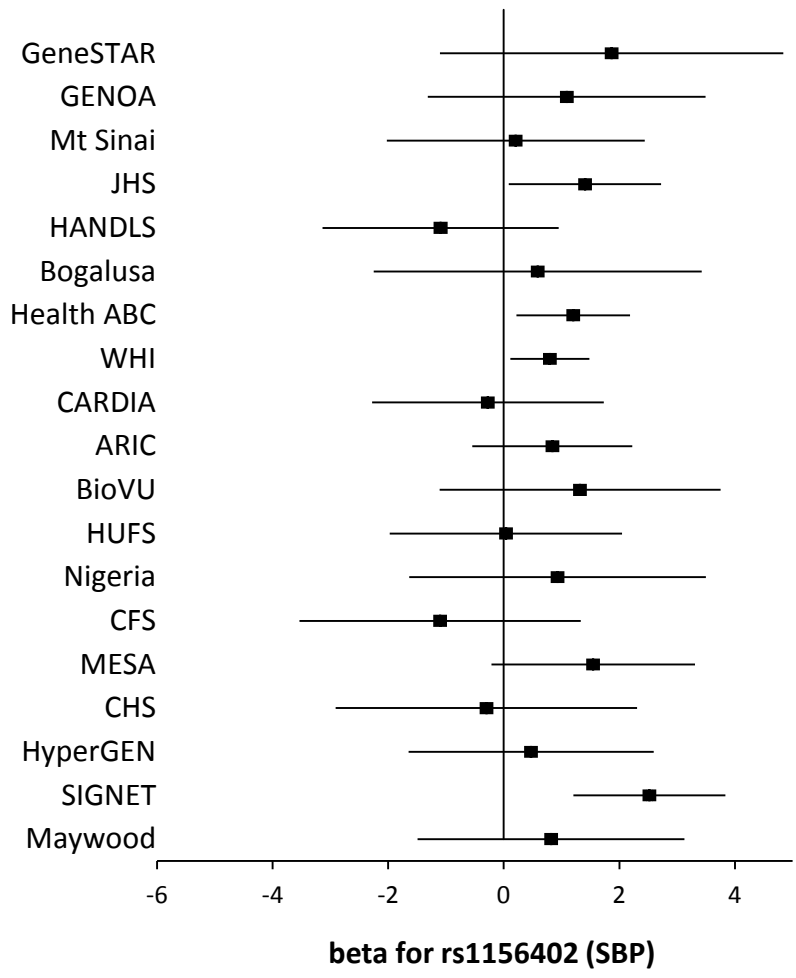

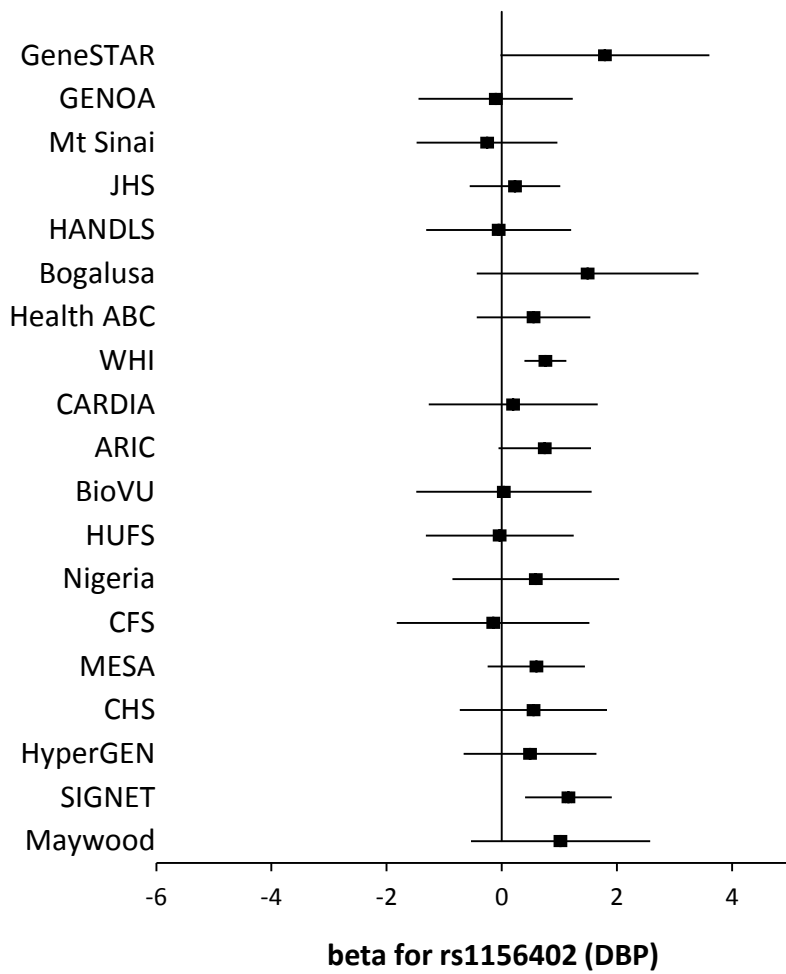

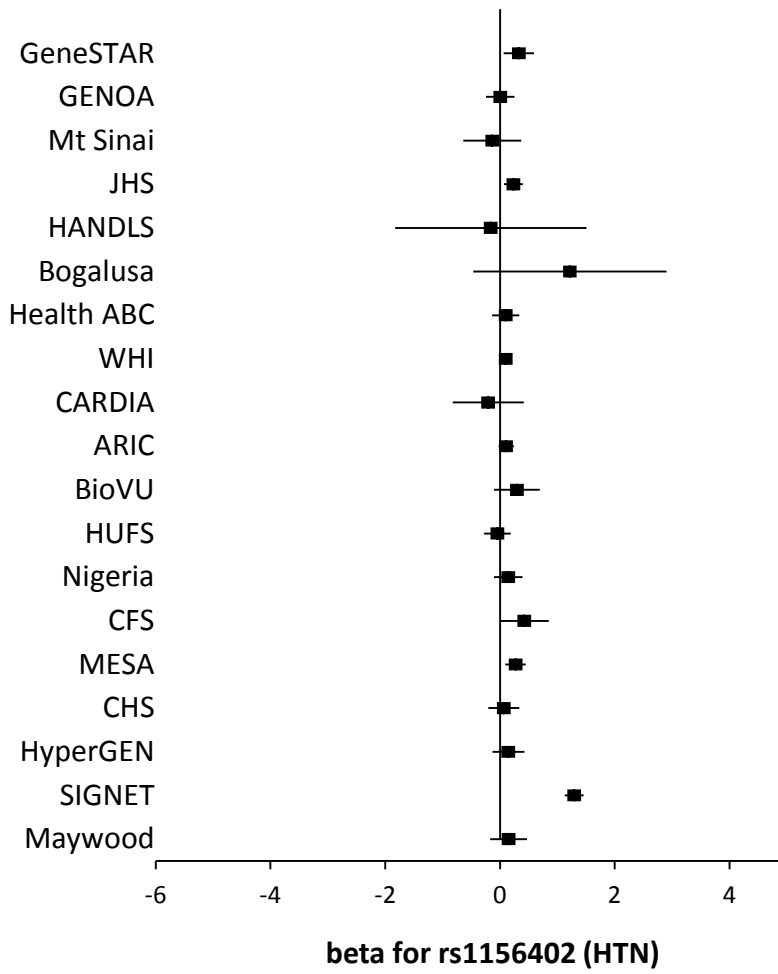

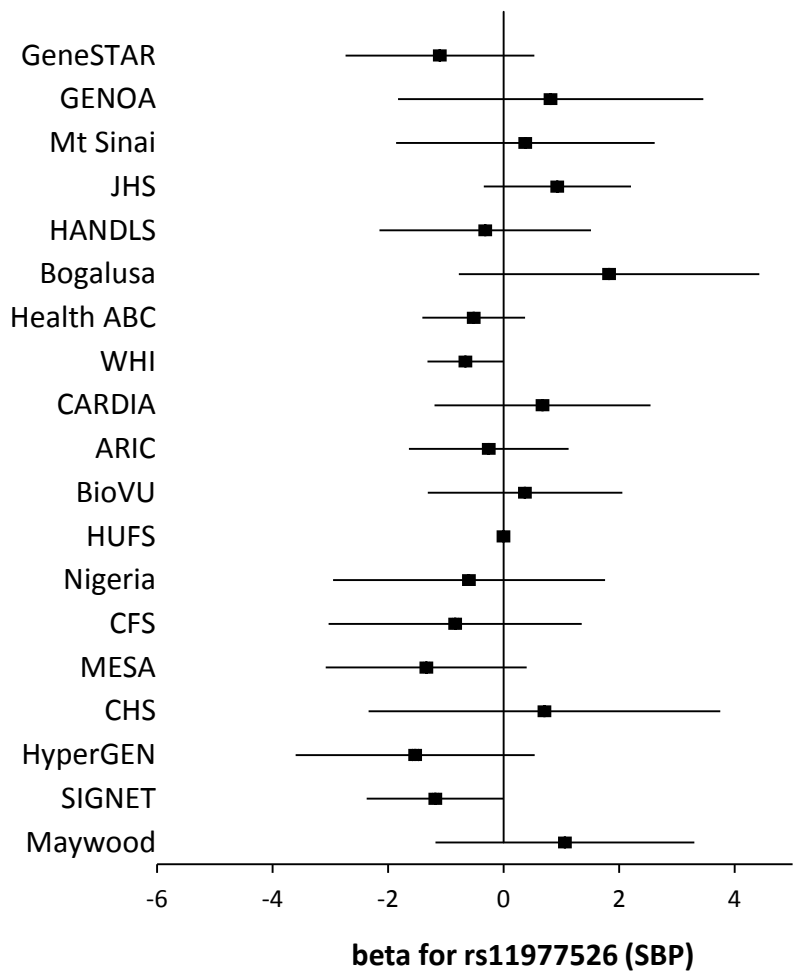



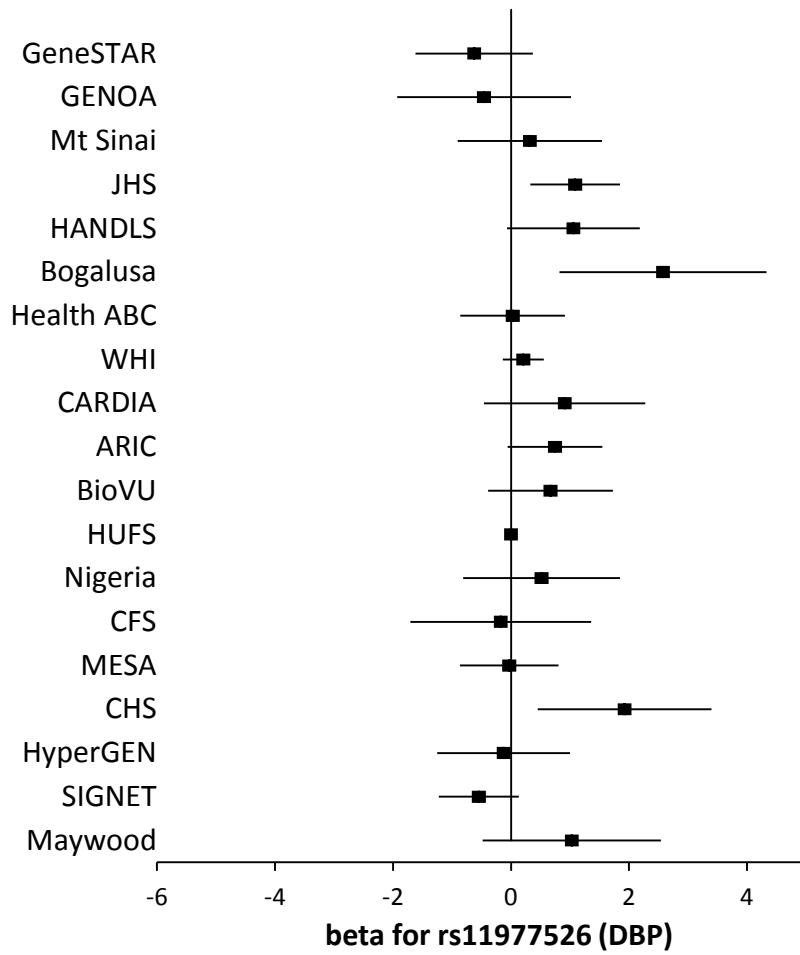

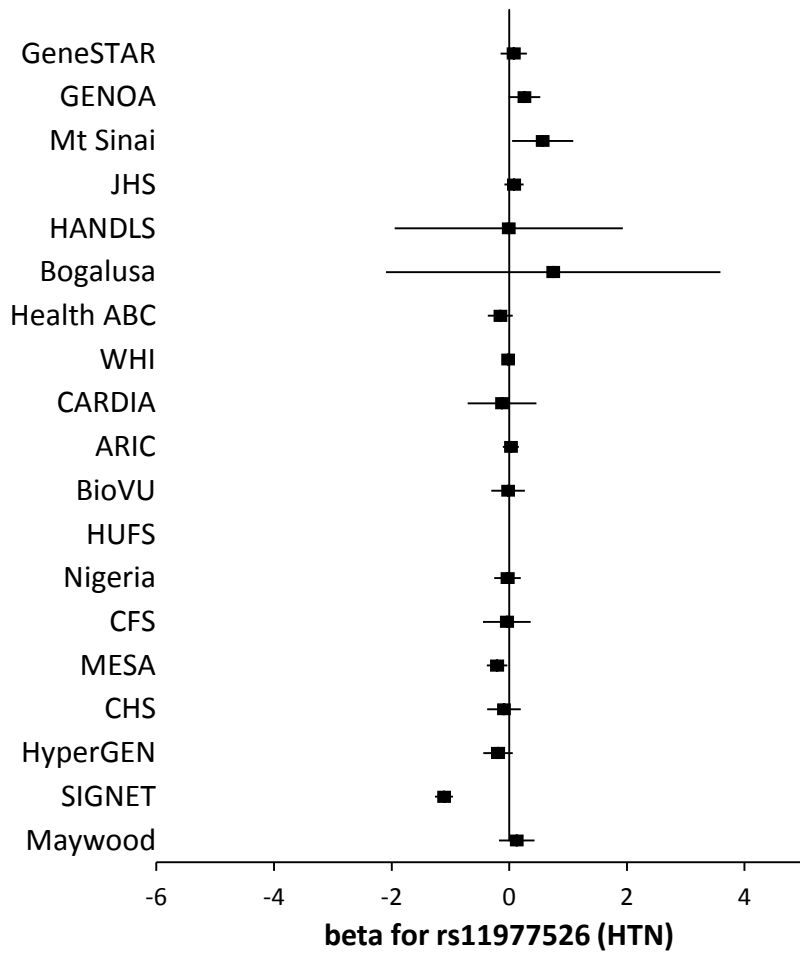

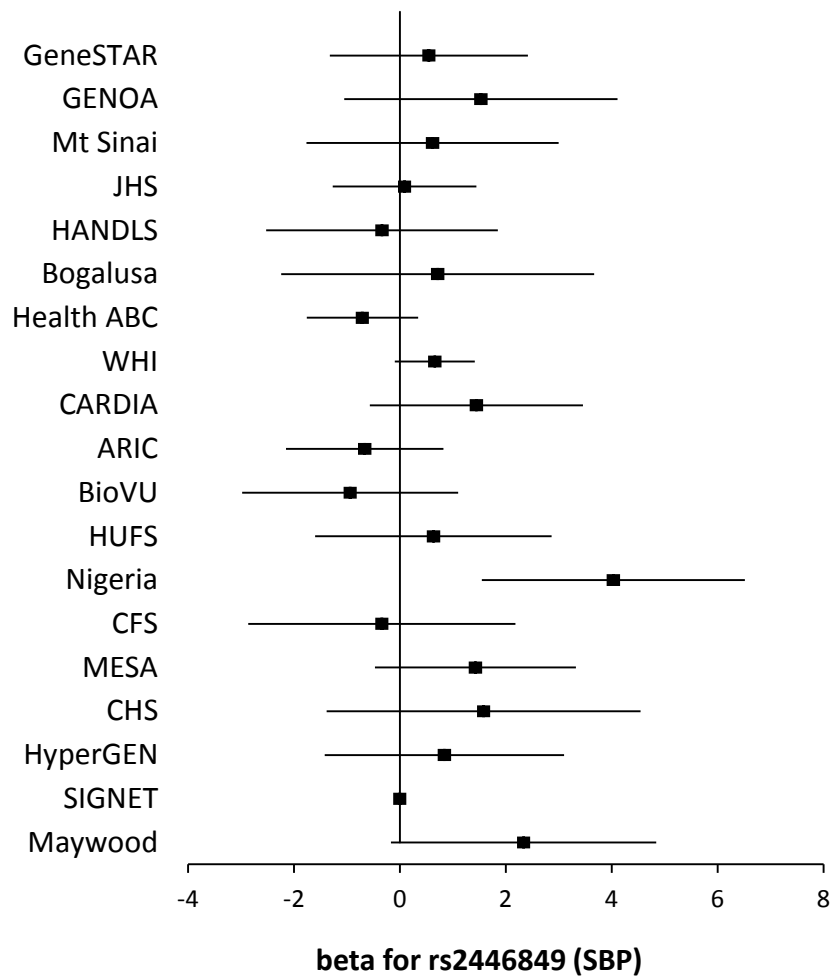

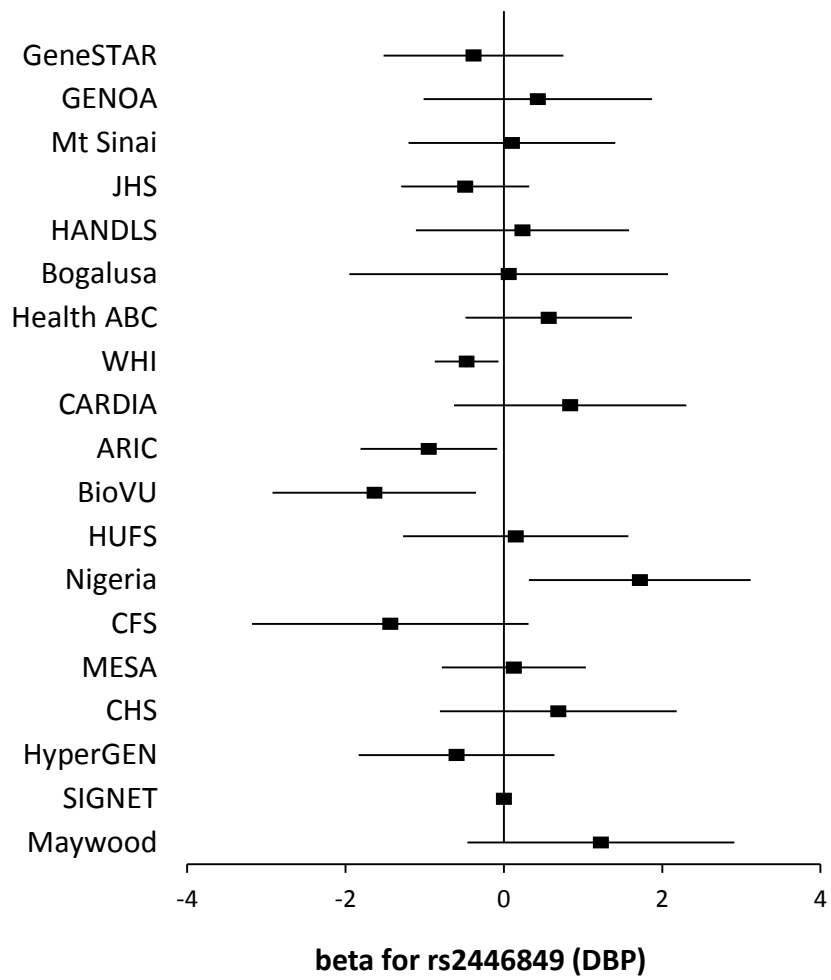

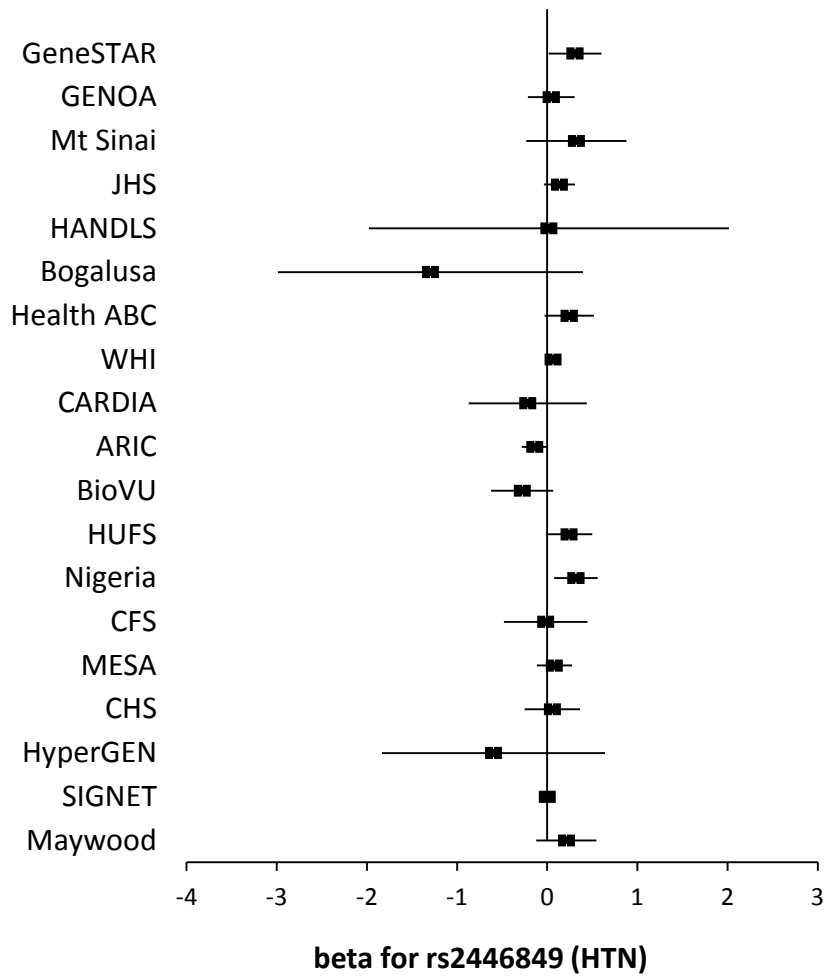

## **Acknowledgments and Funding**

**BioVU:** The dataset(s) used for the analyses described were obtained from Vanderbilt University Medical Center's BioVU which is supported by institutional funding and by the Vanderbilt CTSA grant 1UL1RR024975-01 from NCRR/NIH. Support was also provided by Vanderbilt Clinical and Translational Research Scholar award (5KL2RR024975 to TLE), and Additional support was provided by the Building Interdisciplinary Research Careers in Women's Health career development program (K12HD4383 to DRVE).

**Bogalusa Heart Study (BHS):** NJS is supported in part by NIH/NCRR Grant Number UL1 RR025774. The BHS was supported by grants HD-061437 and HD-062783 from the National Institute of Child Health and Human Development, and AG-16592 from the National Institute on Aging.

**CARe Acknowledgement:** The authors wish to acknowledge the support of the National Heart, Lung, and Blood Institute and the contributions of the research institutions, study investigators, field staff and study participants in creating this resource for biomedical research. The following nine parent studies have contributed parent study data, ancillary study data, and DNA samples through the Broad Institute (N01-HC-65226) to create this genotype/phenotype data base for wide dissemination to the biomedical research community. This work was also funded by the Center of Excellence in Personalized Medicine (CEPMED), the Canada Research Chair program, the "Fonds de recherche du Québec en Santé (FRQS)", and the "Fondation de l'Institut de Cardiologie de Montréal" (to GL):

**Atherosclerotic Risk in Communities (ARIC):** University of North Carolina at Chapel Hill (N01-HC-55015), Baylor Medical College (N01-HC-55016), University of Mississippi Medical Center (N01-HC-55021), University of Minnesota (N01-HC-55019), Johns Hopkins University (N01-HC-55020), University of Texas, Houston (N01-HC-55017), University of North Carolina, Forsyth County (N01-HC-55018);

**Cardiovascular Health Study (CHS):** University of Washington (N01-HC-85079), Wake Forest University (N01-HC-85080), Johns Hopkins University (N01-HC-85081), University of Pittsburgh (N01-HC-85082), University of California, Davis (N01-HC-85083), University of California, Irvine (N01-HC-85084), New England Medical Center (N01-HC-85085), University of Vermont (N01-HC-85086), Georgetown University (N01-HC-35129), Johns Hopkins University (N01-HC-15103), University of Wisconsin (N01-HC-75150), Geisinger Clinic (N01-HC-45133), University of Washington (N01-HC-55222, U01 HL080295); **Cleveland Family Study (CFS):** Case Western Reserve University (RO1 HL46380-01-16);

**Coronary Artery Risk in Young Adults (CARDIA):** University of Alabama at Birmingham (N01-HC-48047), University of Minnesota (N01-HC-48048), Northwestern University (N01-HC-48049), Kaiser Foundation Research Institute (N01-HC-48050), University of Alabama at Birmingham (N01-HC-95095), Tufts-New England Medical Center (N01-HC-45204), Wake Forest University (N01-HC-45205), Harbor-UCLA Research and Education Institute (N01-HC-05187), University of California, Irvine (N01-HC-45134, N01-HC-95100);

**Multi-Ethnic Study of Atherosclerosis (MESA):** MESA is conducted and supported by the National Heart, Lung, and Blood Institute (NHLBI) in collaboration with MESA investigators. Support for MESA is provided by contracts N01-HC-95159 through N01-HC-95169 and UL1-RR-024156. Funding for genotyping was provided by NHLBI Contract N02-HL-6-4278 and N01-HC-65226.

**CHS:** This CHS research was supported by NHLBI contracts N01-HC-85239, N01-HC-85079 through N01-HC-85086; N01-HC-35129, N01 HC-15103, N01 HC-55222, N01-HC-75150, N01-HC-45133, HHSN268201200036C and NHLBI grants HL080295, HL-085251, HL087652, HL105756 with additional contribution from NINDS. Additional support was provided through AG-023629, AG-15928, AG-20098, and AG-027058 from the NIA. See also <http://www.chs-nhlbi.org/pi.htm>. DNA handling and genotyping was supported in part by National Center of Advancing Translational Technologies CTSI grant UL1TR000124 and National Institute of Diabetes and Digestive and Kidney Diseases grant DK063491 to the Southern California Diabetes Endocrinology Research Center and the Cedars-Sinai Board of Governors' Chair in Medical Genetics (JIR).

**FBPP:** Axiom study is supported by the National Institutes of Health, grant number HL086718 from National Heart, Lung, Blood Institute. Z Zhang and X Zhu are supported by HL086718 from National Heart, Lung, Blood Institute and HG003054 from the National Human Genome Research Institute.

**GeneSTAR:** GeneSTAR was supported by NIH grants through the National Institute of Nursing Research (NR0224103) and the National Heart, Lung, and Blood Institute (HL58625-01A1, HL59684, HL071025-01A1, U01HL72518, and HL087698); and by M01-RR000052 to the Johns Hopkins General Clinical Research Center.

**GENOA:** Genetic Epidemiology Network of Arteriopathy (GENOA) study is supported by the National Institutes of Health, grant numbers HL087660 and HL100245 from the National Heart, Lung, Blood Institute.

**HANDLS:** The Healthy Aging in Neighborhoods of Diversity across the Life Span Study (HANDLS) research was supported by the Intramural Research Program of the NIH, National Institute on Aging and the National Center on Minority Health and Health Disparities (project # Z01-AG000513 and human subjects protocol # 2009-149). Data analyses for the HANDLS study utilized the high-performance computational capabilities of the Biowulf Linux cluster at the National Institutes of Health, Bethesda, Md. (<http://biowulf.nih.gov>).

**HealthABC:** Health ABC was funded by the National Institutes of Aging. This research was supported by NIA contracts N01AG62101, N01AG62103, and N01AG62106. The GWAS was funded by NIA grant 1R01AG032098-01A1 to Wake Forest University Health Sciences and genotyping services were provided by the Center for Inherited Disease Research (CIDR). CIDR is fully funded through a federal contract from the National Institutes of Health to The Johns Hopkins University, contract number HHSN268200782096C. This research was supported in part by the Intramural Research Program of the NIH, National Institute on Aging.

**HUFS:** The Howard University Family Study was supported by National Institutes of Health grants S06GM008016-320107 to Charles Rotimi and S06GM008016-380111 to Adebowale Adeyemo. We thank the participants of the study, for which enrollment was carried out at the Howard University General Clinical Research Center, supported by National Institutes of Health grant 2M01RR010284. The contents of this publication are solely the responsibility of the authors and do not necessarily represent the official view of the National Institutes of Health. This research was supported in part by the Intramural Research Program of the Center for Research on Genomics and Global Health (CRGGH). The CRGGH is supported by the National Human Genome Research Institute, the National Institute of Diabetes and Digestive and Kidney Diseases, the Center for Information Technology, and the Office of the Director at the National Institutes of Health (Z01HG200362). Genotyping support was provided by the Coriell Institute for Medical Research.

**HyperGEN:** The hypertension network is funded by cooperative agreements (U10) with NHLBI: HL54471, HL54472, HL54473, HL54495, HL54496, HL54497, HL54509, HL54515, and 2 R01 HL55673-12. The study involves: University of Utah (Network Coordinating Center, Field Center, and Molecular Genetics Lab); Univ. of Alabama at Birmingham (Field Center and Echo Coordinating and Analysis Center); Medical College of Wisconsin (Echo Genotyping Lab); Boston University (Field Center); University of Minnesota (Field Center and Biochemistry Lab); University of North Carolina (Field Center); Washington University (Data Coordinating Center); Weil Cornell Medical College (Echo Reading Center); National Heart, Lung, & Blood Institute. For a complete list of HyperGEN Investigators please see: [www.biostat.wustl.edu/hypergen/Acknowledge.html](http://www.biostat.wustl.edu/hypergen/Acknowledge.html)



**Loyola-Nigeria:** The Loyola-Nigeria study was supported by NIH grant numbers R01-HL053353. The authors acknowledge the assistance of the research staff and participants in Ibadan and Igbo-Ora, Oyo State, Nigeria.

**Loyola-Maywood:** Maywood African-American study is supported by the National Institutes of Health grant number HL074166 from National Heart, Lung, Blood Institute.

**Mt Sinai IPM Study:** The Mt. Sinai IPM study was supported by The Andrea and Charles Bronfman Philanthropies. The authors would like to thank the participants from New York City, United States, for participating in the Mount Sinai IPM Biobank Program.

**SIGNET:** We would like to thank all of the participants of the REGARDS Study for their valuable contributions, as well as REGARDS investigators and staff. The REGARDS Study research was supported by a cooperative agreement U01 NS041588 (Howard) and R01 DK084350 (Sale) from the National Institutes of Health.

**WHI:** The **WHI** program is funded by the National Heart, Lung, and Blood Institute, National Institutes of Health, U.S. Department of Health and Human Services through contracts N01WH22110, 24152, 32100-2, 32105-6, 32108-9, 32111-13, 32115, 32118-32119, 32122, 42107-26, 42129-32, and 44221.
